# Supplementary material for: DEAD-Box RNA Helicase Family in Physic Nut (Jatropha curcas L.): Structural Characterization and Response to Salinity
Source: MDPI journal article supplement (doi:10.3390/plants13060905), 2024-03-21

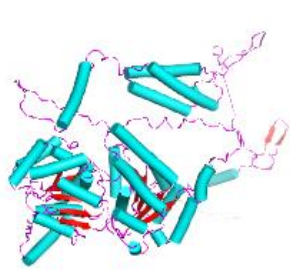

**JcDHX1**

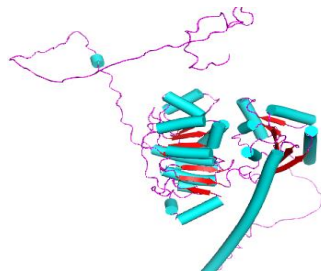

**JcDHX2**

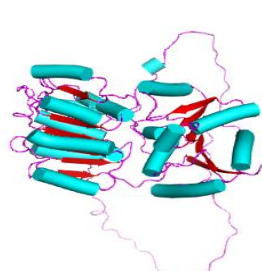

**JcDHX3**

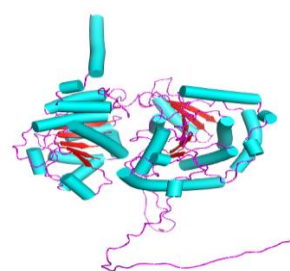

**JcDHX4**

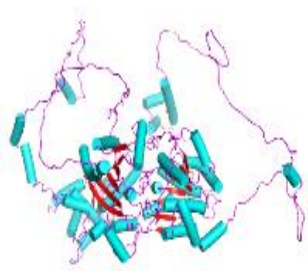

**JcDHX5**

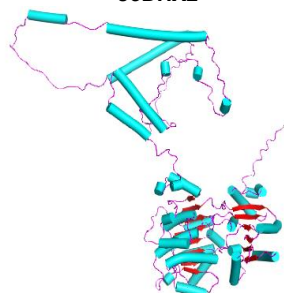

**JcDHX6**

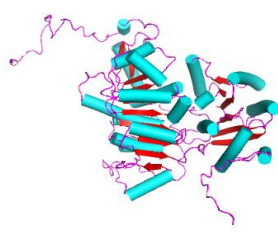

**JcDHX7**

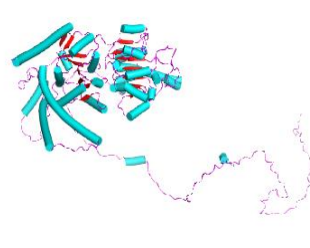

**JcDHX8**

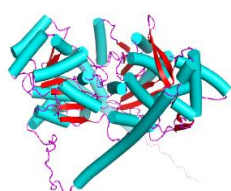

**JcDHX9**

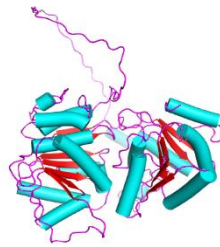

**JcDHX10**

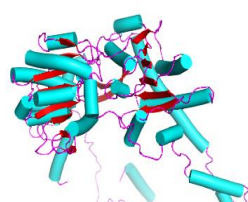

**JcDHX11**

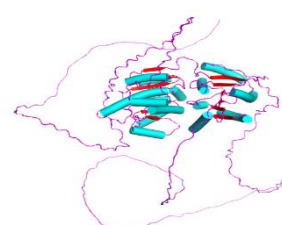

**JcDHX13**

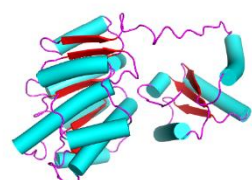

**JcDHX14**

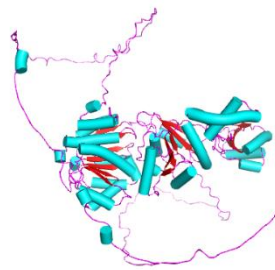

**JcDHX15**

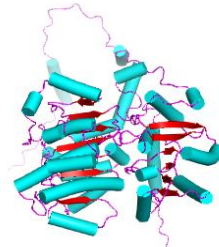

**JcDHX17**

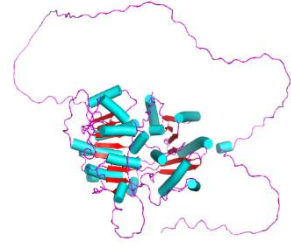

**JcDHX18**

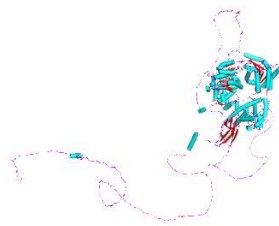

**JcDHX19**

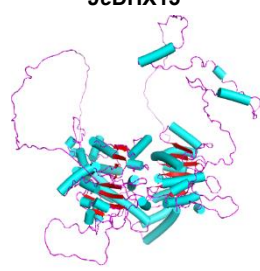

**JcDHX20**

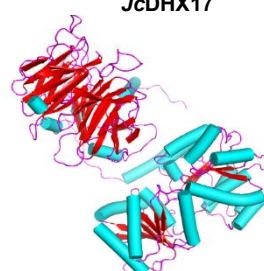

**JcDHX22**

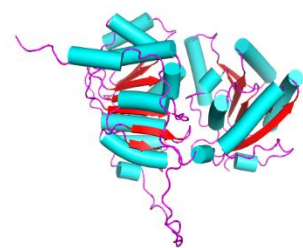

**JcDHX23**

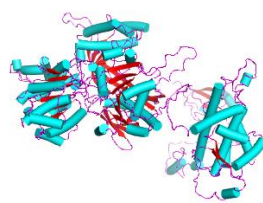

**JcDHX24**

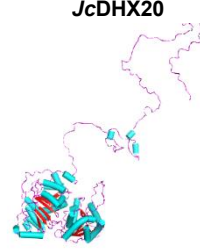

**JcDHX25**

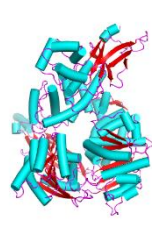

**JcDHX26**

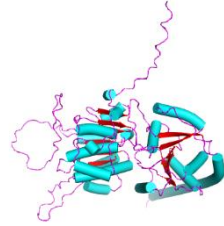

**JcDHX27**

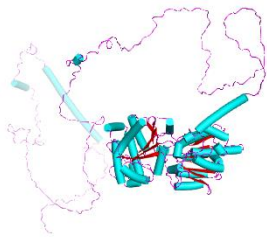

***JcDHX28***

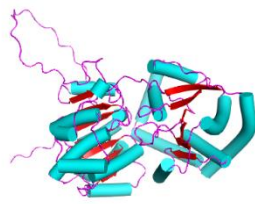

***JcDHX30***

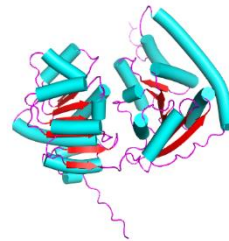

***JcDHX31***

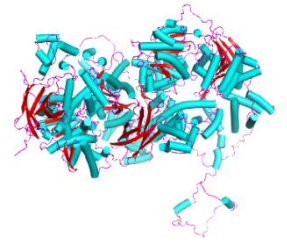

***JcDHX32***

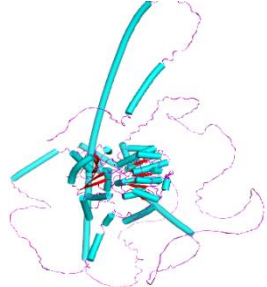

***JcDHX33***

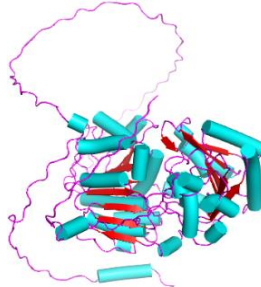

***JcDHX34***

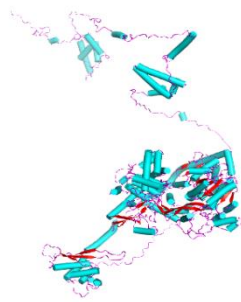

***JcDHX35***

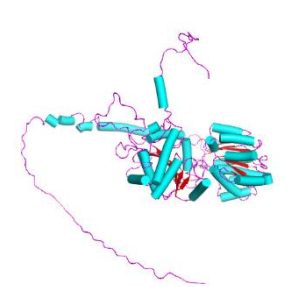

***JcDHX36***

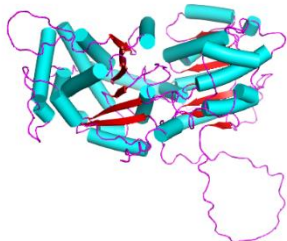

***JcDHX38***

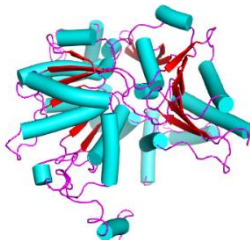

***JcDHX39***

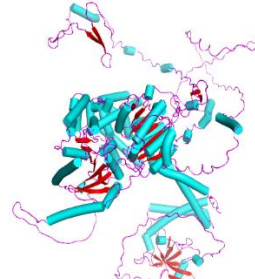

***JcDHX40***

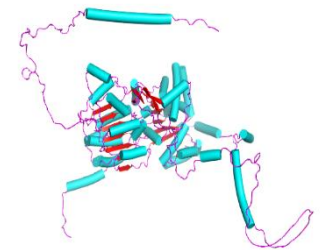

***JcDHX42***

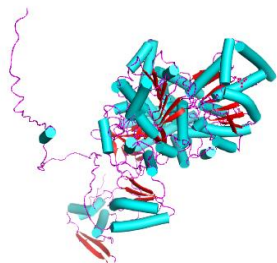

***JcDHX43***

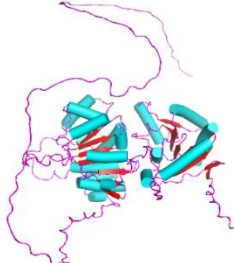

***JcDHX44***

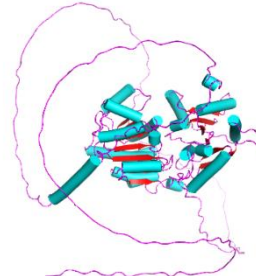

***JcDHX45***

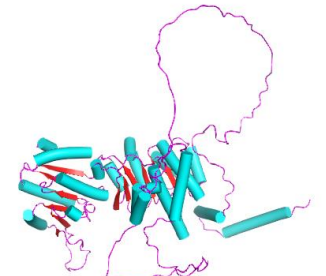

***JcDHX46***

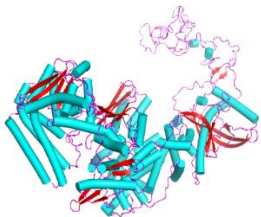

***JcDHX47***

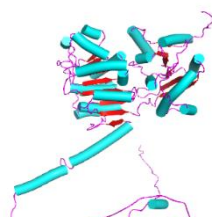

***JcDHX48***

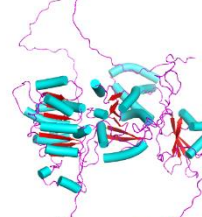

***JcDHX49***

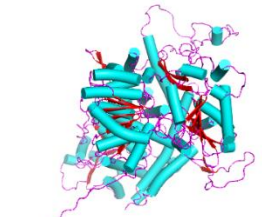

***JcDHX51***

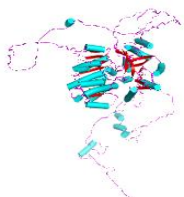

***JcDHX52***

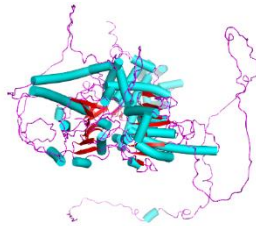

***JcDHX53***

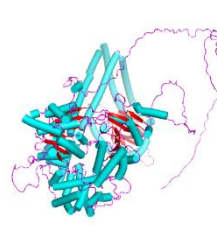

***JcDHX54***

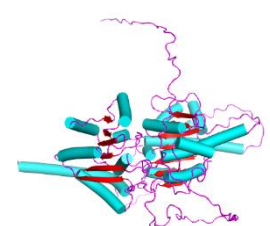

***JcDHX55***

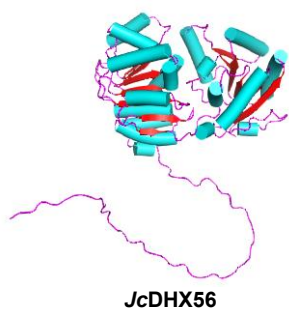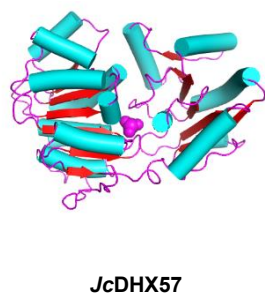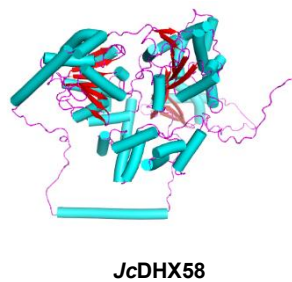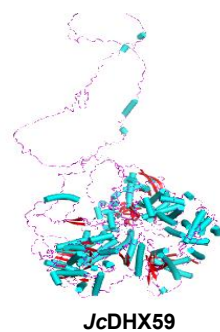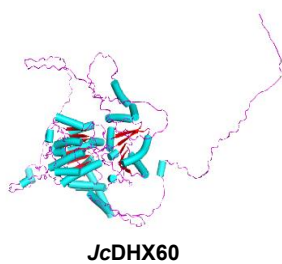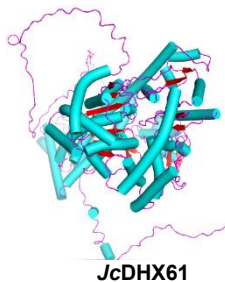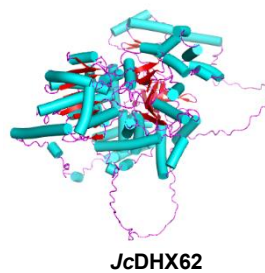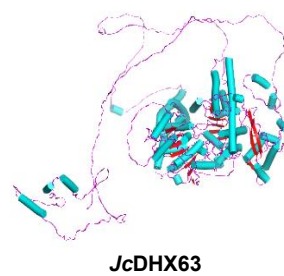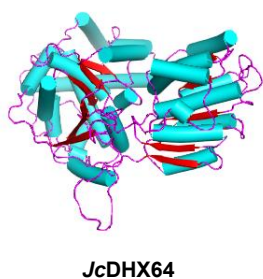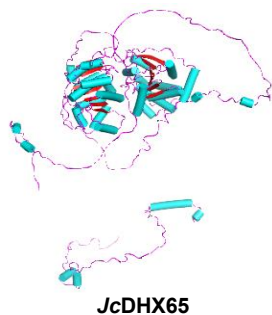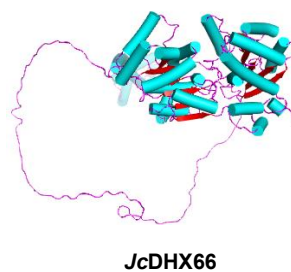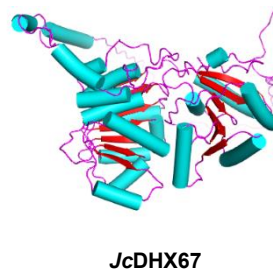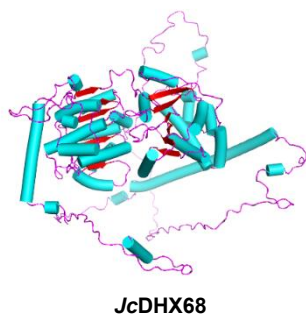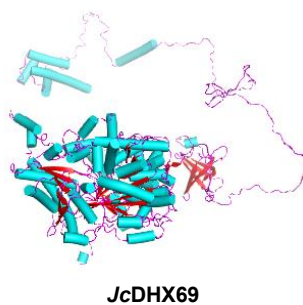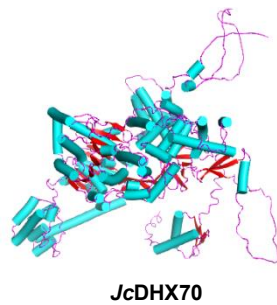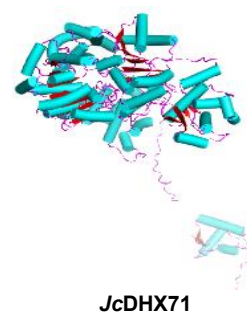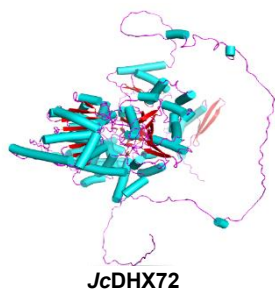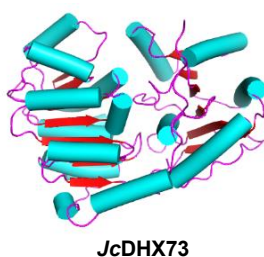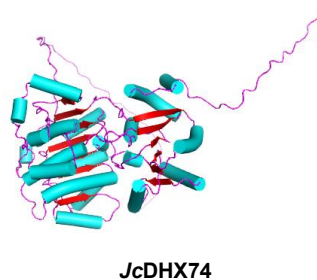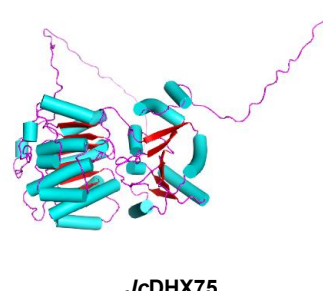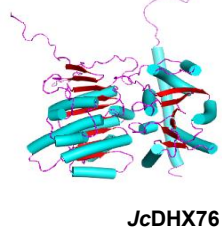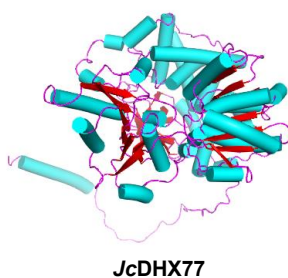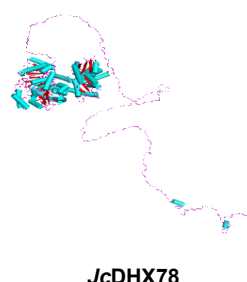

Supplement: s1 [file s1]
