# Supplementary material for: DEAD-Box RNA Helicase Family in Physic Nut (Jatropha curcas L.): Structural Characterization and Response to Salinity
Source: MDPI journal article supplement (doi:10.3390/plants13060905), 2024-03-21
Supplement: s1 [file s1]

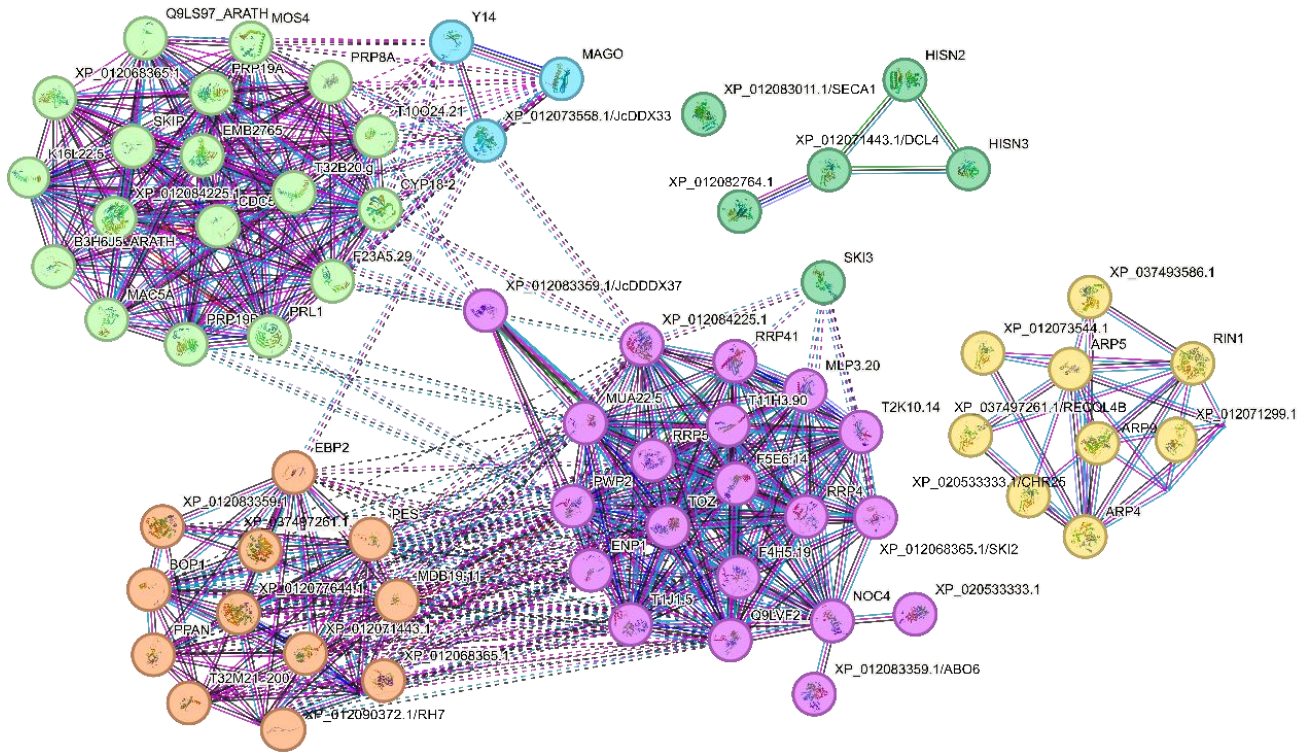

Clusters:

- |                                                                  |                                                                           |                                                                 |
|------------------------------------------------------------------|---------------------------------------------------------------------------|-----------------------------------------------------------------|
| <span style="color: purple;">■</span> RNA degradation by exosome | <span style="color: lightgreen;">■</span> Spliceosome                     | <span style="color: orange;">■</span> Ribosomal biogenesis      |
| <span style="color: cyan;">■</span> Exon-exon junction complex   | <span style="color: yellow;">■</span> Chromatin remodeling and DNA repair | <span style="color: darkgreen;">■</span> Histidine biosynthesis |
