# Supplementary material for: DEAD-Box RNA Helicase Family in Physic Nut (Jatropha curcas L.): Structural Characterization and Response to Salinity
Source: MDPI journal article supplement (doi:10.3390/plants13060905), 2024-03-21
Supplement: s1 [file s1]

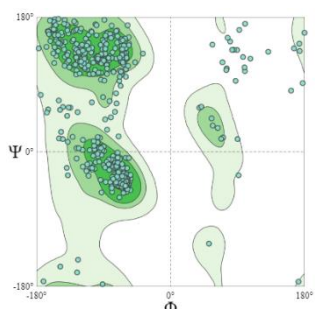

**JcDHX1**

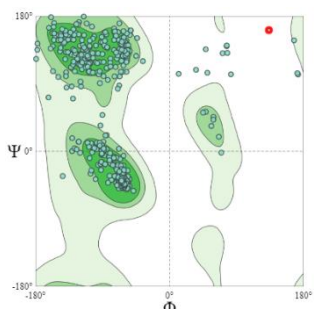

**JcDHX2**

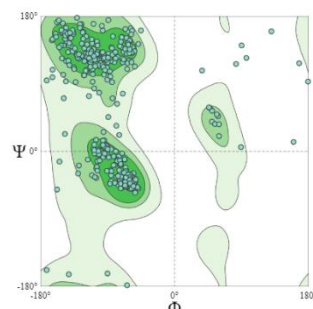

**JcDHX3**

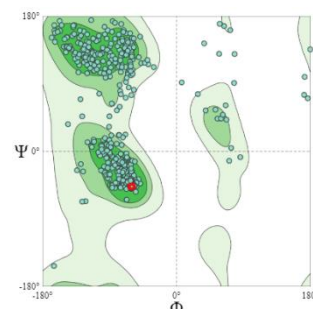

**JcDHX4**

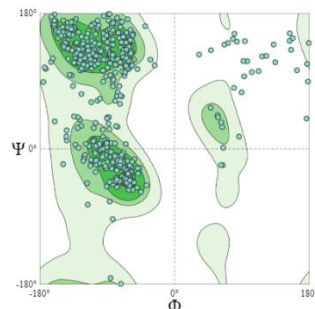

**JcDHX5**

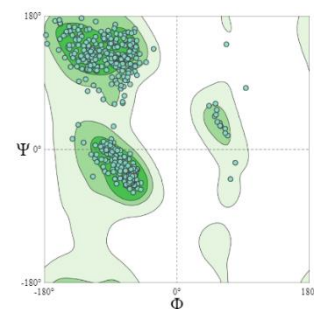

**JcDHX6**

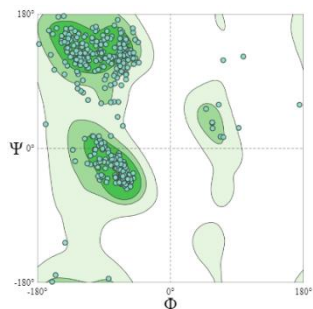

**JcDHX7**

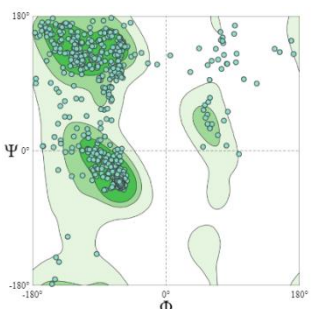

**JcDHX8**

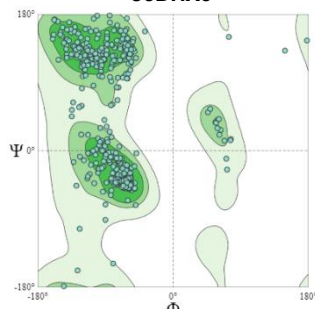

**JcDHX9**

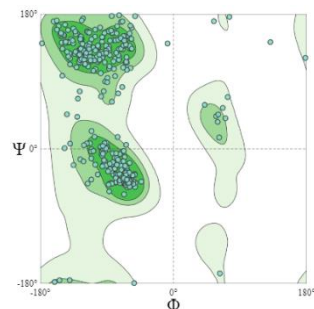

**JcDDX10**

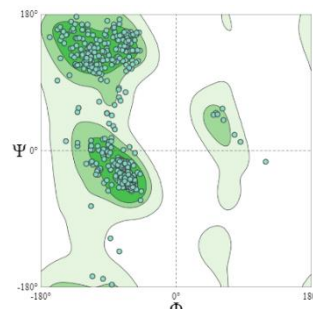

**JcDHX11**

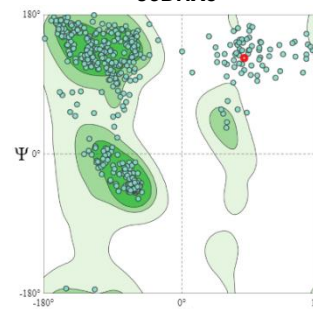

**JcDHX13**

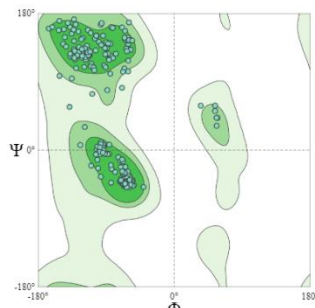

**JcDHX14**

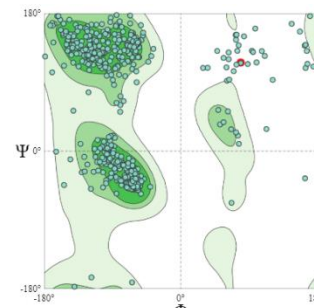

**JcDHX15**

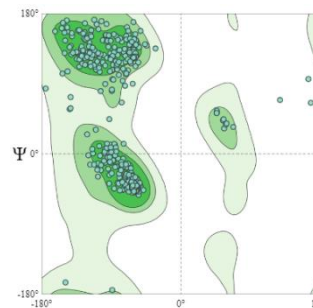

**JcDHX17**

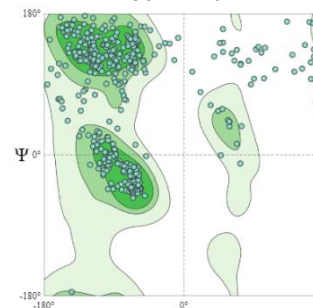

**JcDHX18**

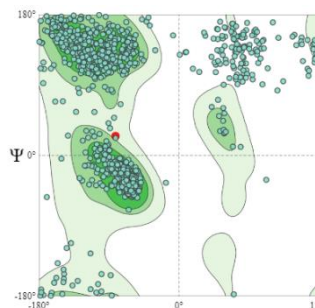

**JcDHX19**

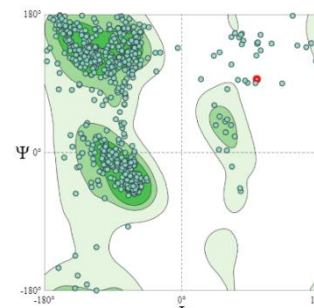

**JcDHX20**

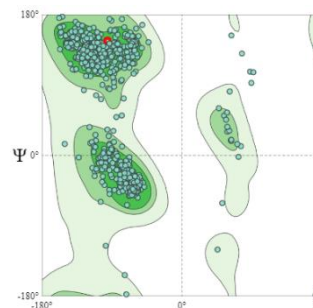

**JcDHX22**

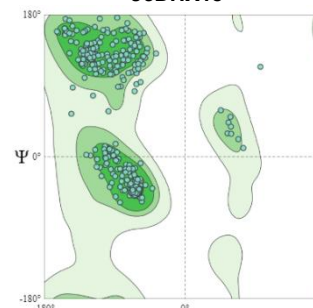

**JcDHX23**

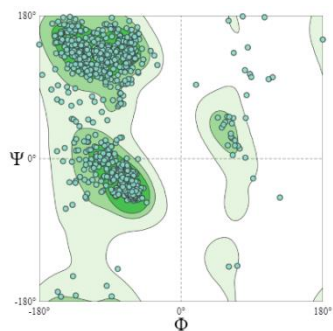

**JcDHX24**

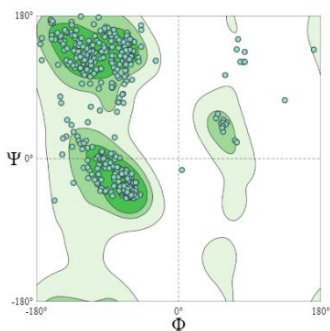

**JcDHX25**

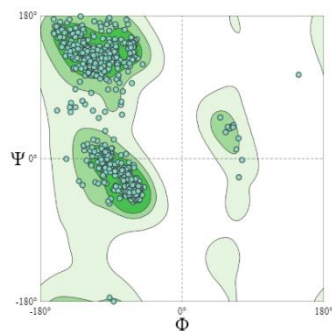

**JcDHX26**

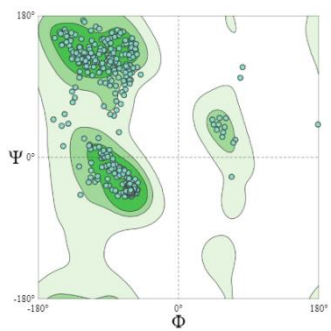

**JcDHX27**

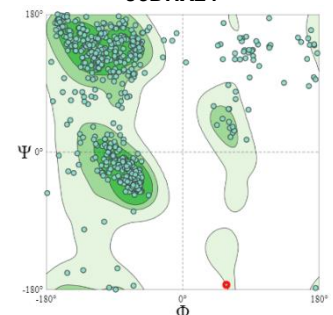

**JcDHX28**

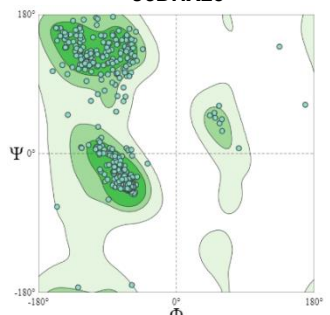

**JcDHX30**

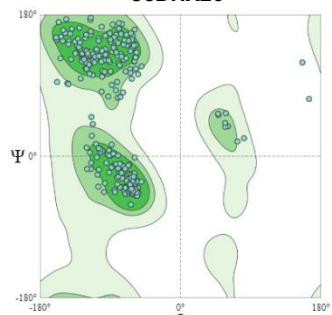

**JcDHX31**

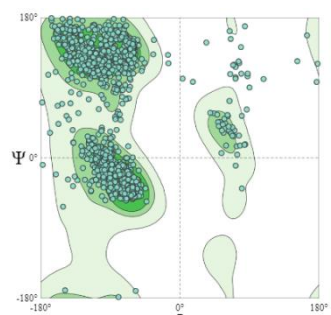

**JcDHX32**

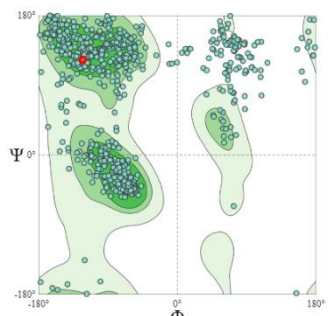

**JcDHX33**

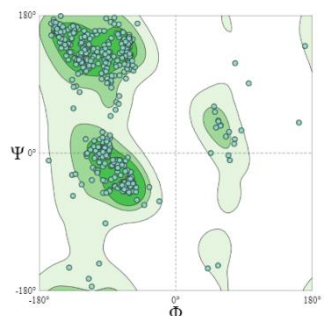

**JcDHX34**

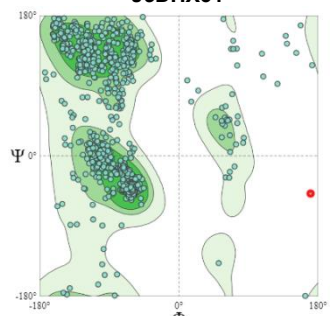

**JcDHX35**

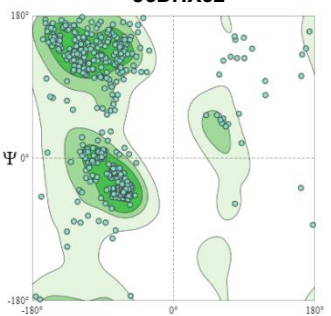

**JcDHX36**

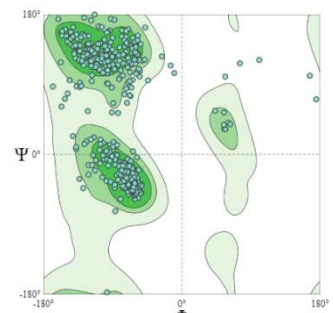

**JcDHX38**

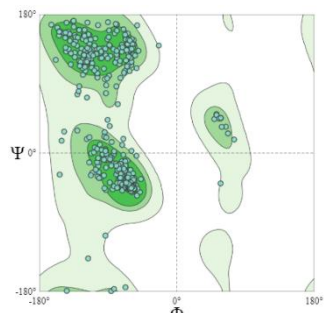

**JcDHX39**

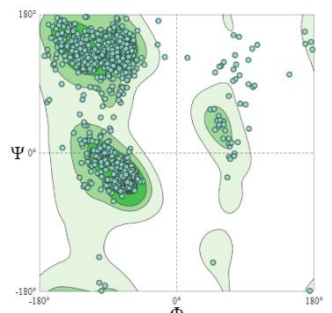

**JcDHX40**

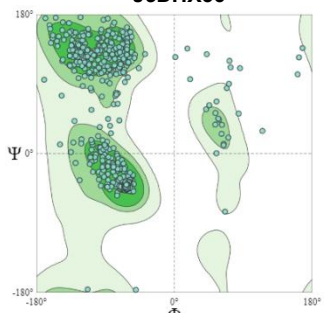

**JcDHX42**

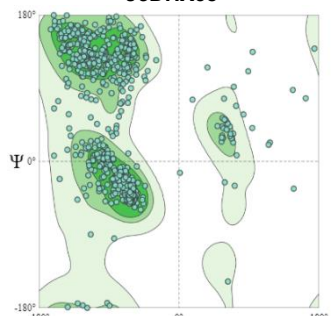

**JcDHX43**

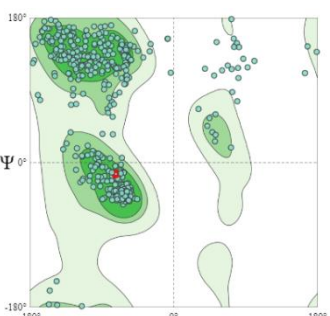

**JcDHX44**

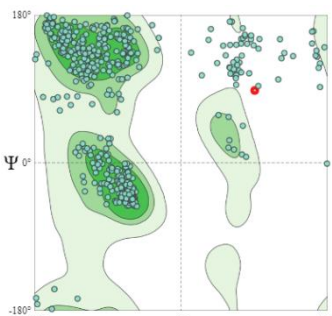

**JcDHX45**

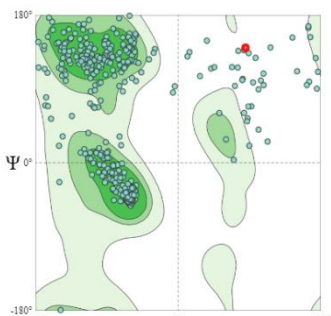

**JcDHX46**



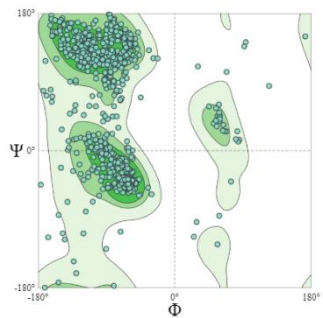

**JcDHX47**

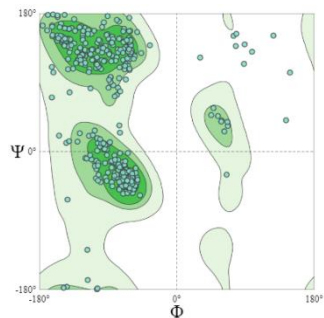

**JcDHX48**

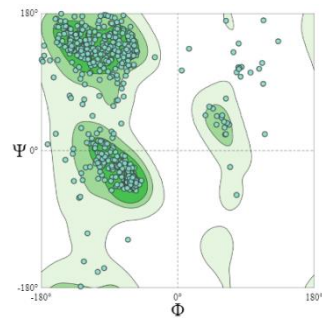

**JcDHX49**

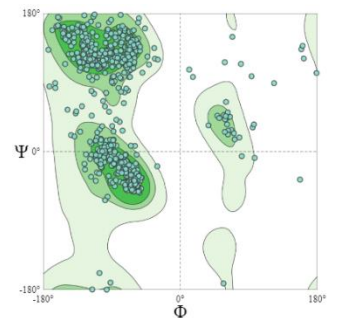

**JcDHX51**

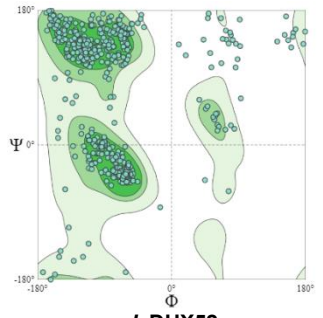

**JcDHX52**

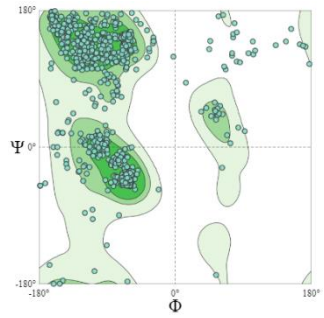

**JcDHX53**

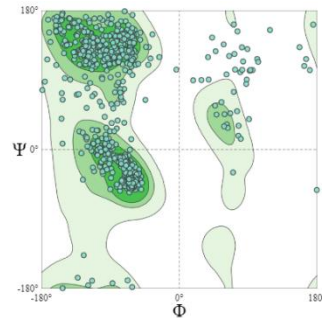

**JcDHX54**

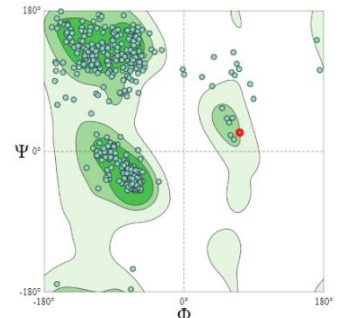

**JcDHX55**

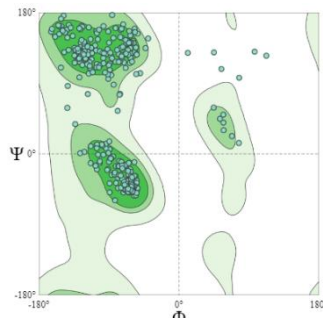

**JcDHX56**

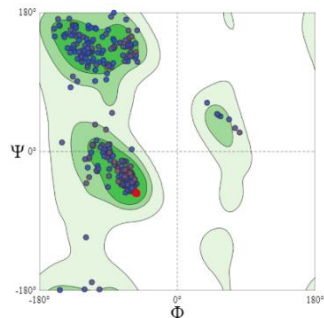

**JcDHX57**

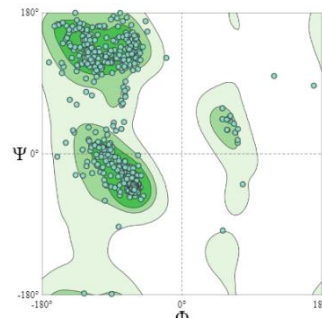

**JcDHX58**

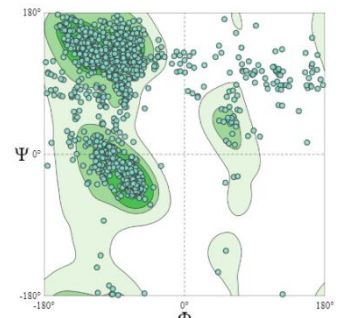

**JcDHX59**

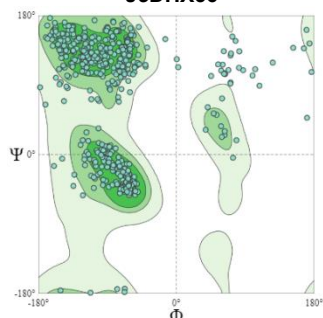

**JcDHX60**

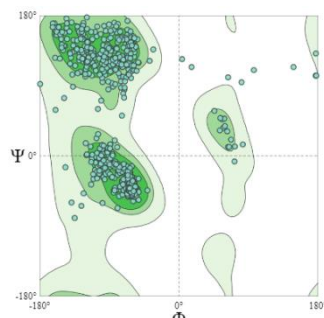

**JcDHX61**

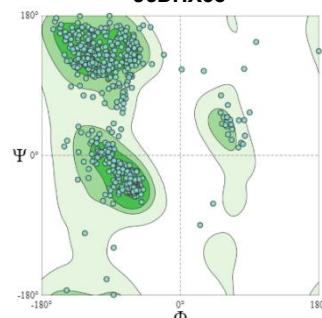

**JcDHX62**

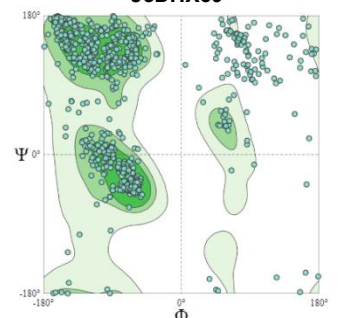

**JcDHX63**

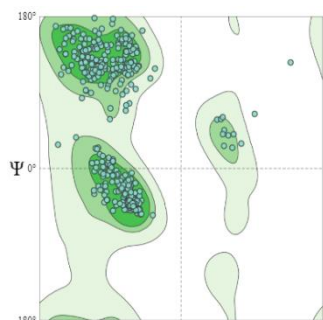

**JcDHX64**

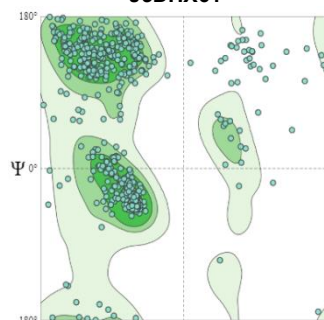

**JcDHX65**

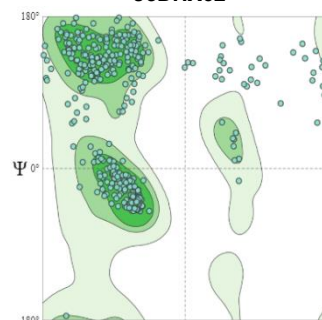

**JcDHX66**

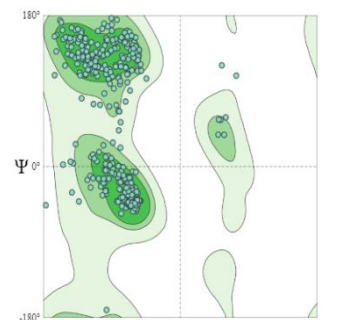

**JcDHX67**

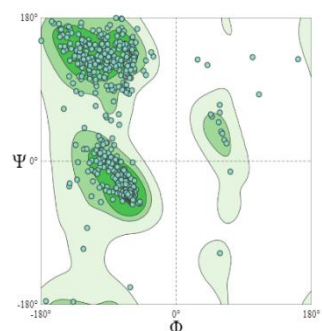

**JcDHX68**

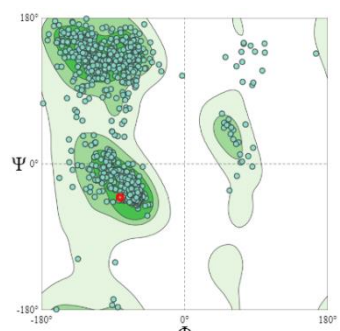

**JcDHX69**

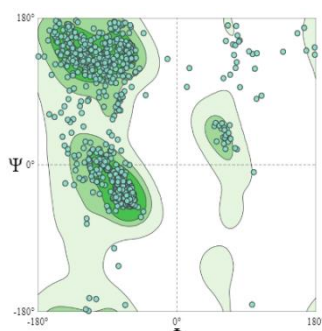

**JcDHX70**

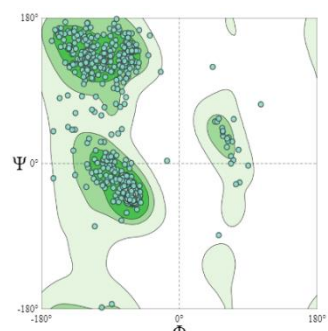

**JcDHX71**

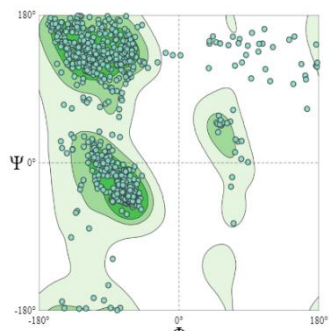

**JcDHX72**

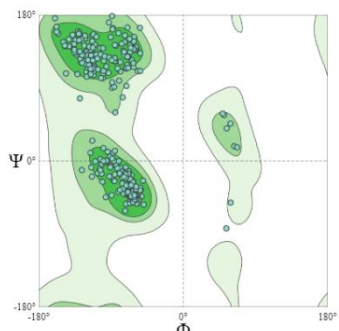

**JcDHX73**

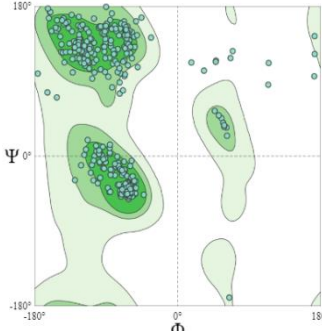

**JcDHX74**

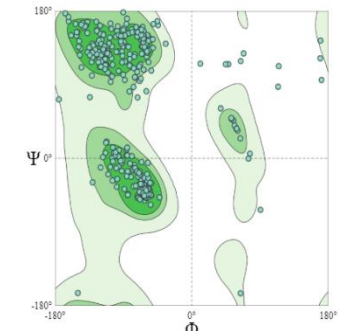

**JcDHX75**

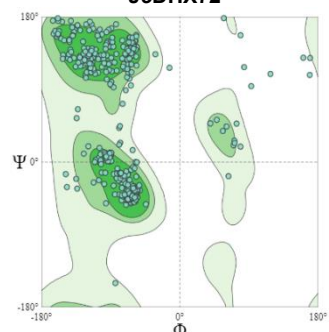

**JcDHX76**

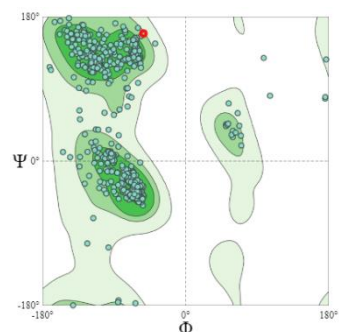

**JcDHX77**

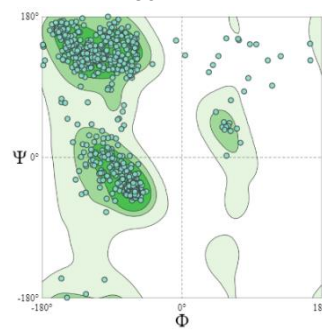

**JcDHX78**
