# Supplementary material for: DEAD-Box RNA Helicase Family in Physic Nut (Jatropha curcas L.): Structural Characterization and Response to Salinity
Source: MDPI journal article supplement (doi:10.3390/plants13060905), 2024-03-21
Supplement: s1 [file s1]

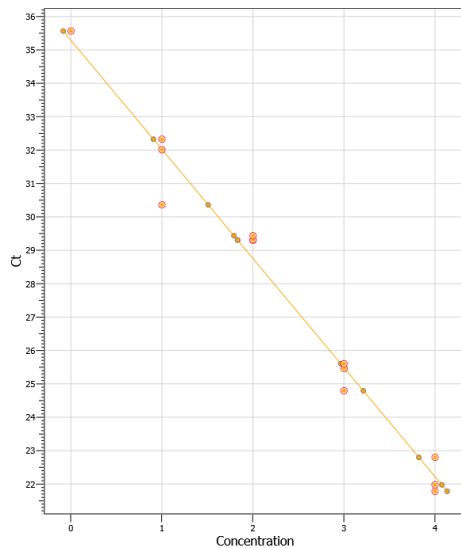

DN43295\_g1\_i2

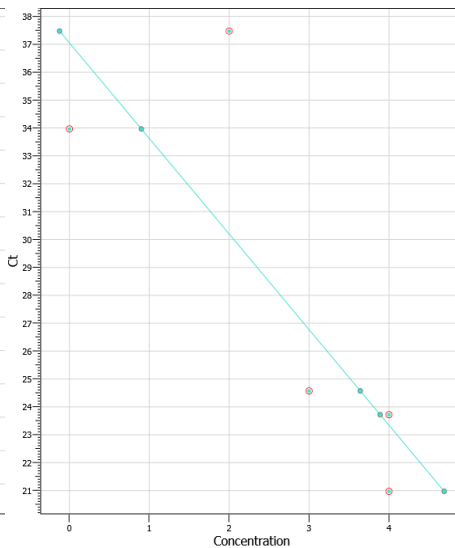

DN43259\_g2\_i2

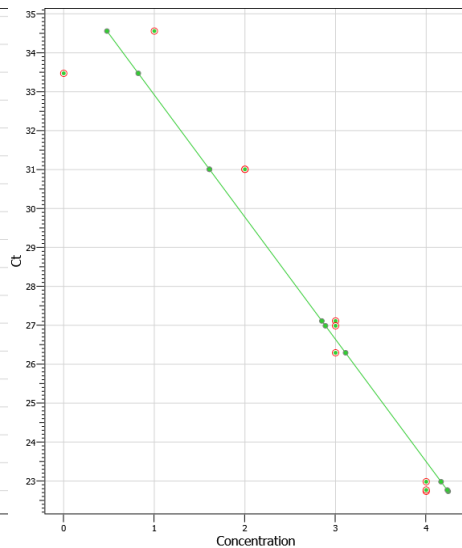

DN39804\_g2\_i2

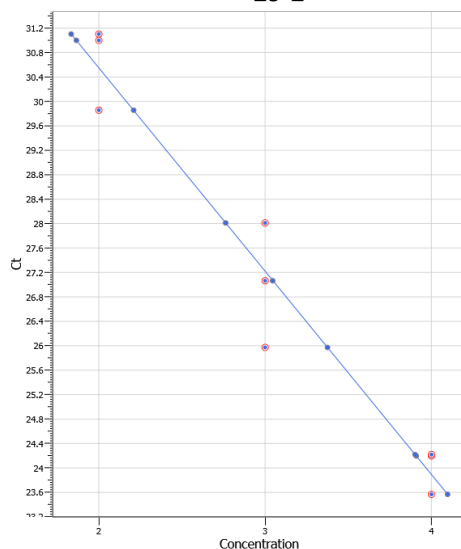

DN43635\_g1\_i2

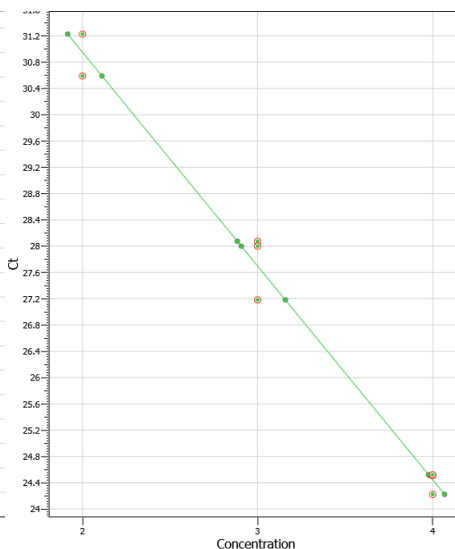

DN36330\_g1\_i1

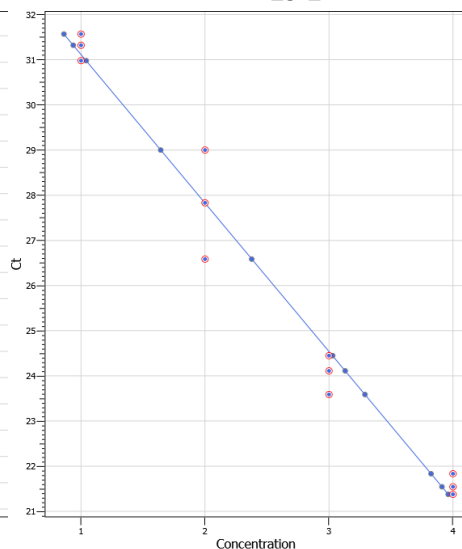

DN97737\_g2\_i1

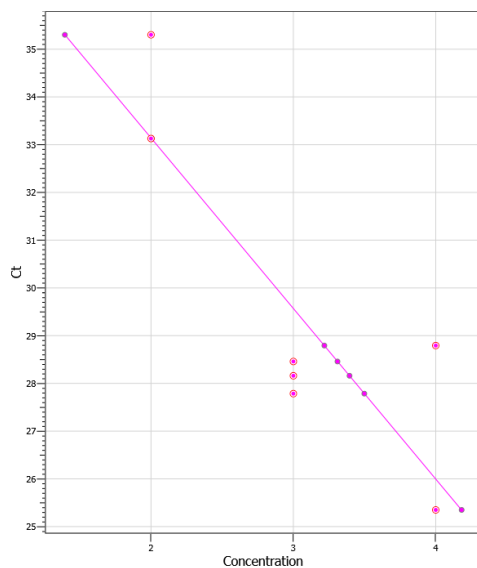

Assay: DN40374\_g1\_i1 - SYBR Intercept: 40.28 Slope: -3.57 Error: 0.056 Correlation: 0.852 Efficiency: 90.52

DN40374\_g1\_i2

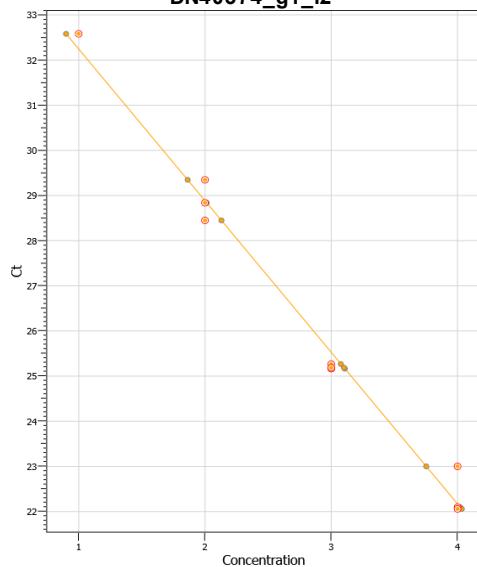

Assay: DN40374\_g1\_i2 - SYBR Intercept: 35.6 Slope: -3.36 Error: 0.015 Correlation: 0.993 Efficiency: 98.48

DN85598\_g1\_i1

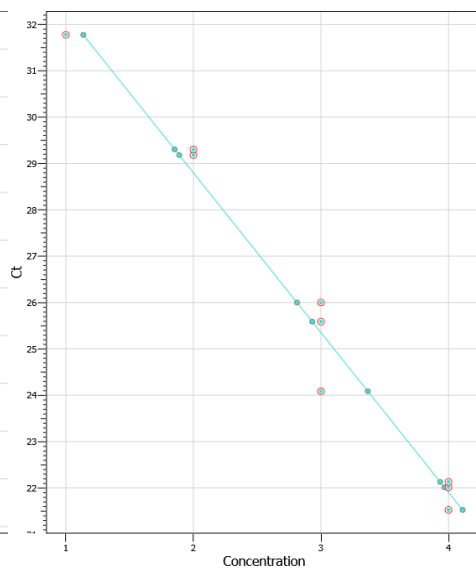

Assay: DN62351\_g1\_i1 - SYBR Intercept: 35.69 Slope: -3.45 Error: 0.022 Correlation: 0.987 Efficiency: 95.05

DN62351\_g1\_i1

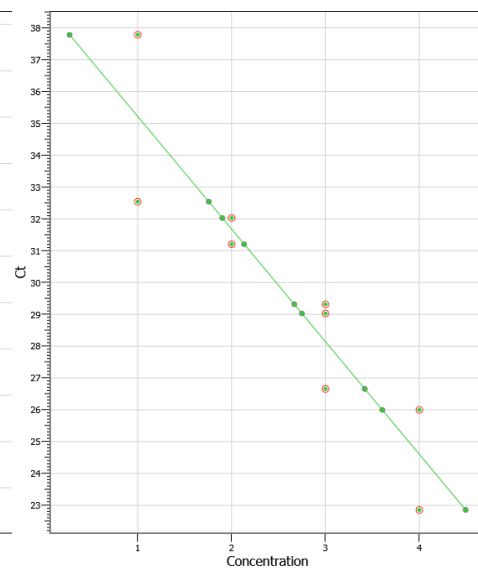

Assay: DN7180\_g1\_i1 - SYBR Intercept: 38.76 Slope: -3.54 Error: 0.054 Correlation: 0.919 Efficiency: 91.69

DN7180\_g1\_i1

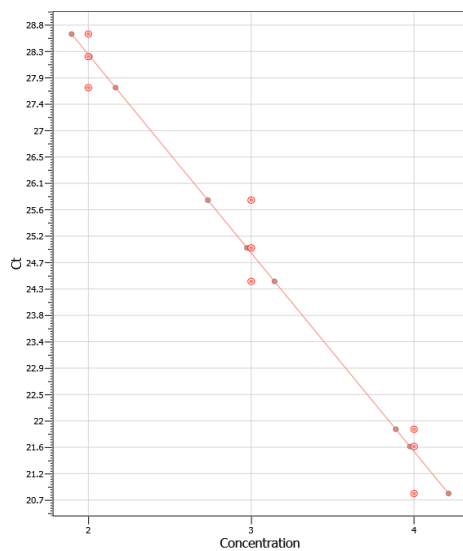

Assay: **B3B4 - SYBR** Intercept: **35.07** Slope: **-3.39** Error: **0.020** Correlation: **-0.985** Efficiency: **97.43**

**DN43391\_g1\_i3**

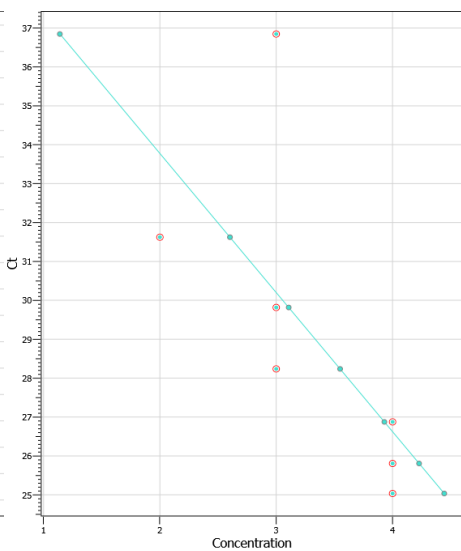

Assay: **B5B6 - SYBR** Intercept: **40.93** Slope: **-3.58** Error: **0.097** Correlation: **-0.663** Efficiency: **90.38**

**DN39804\_g2\_i1**

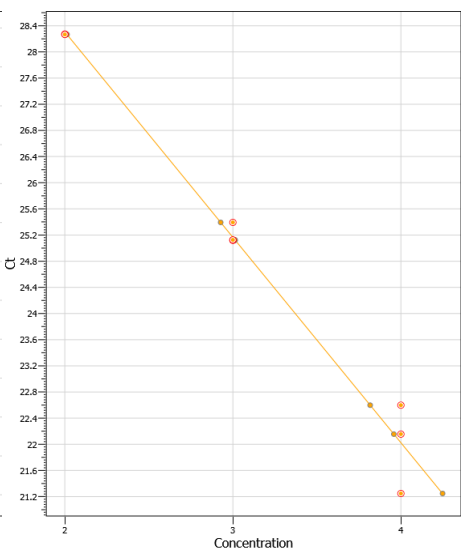

Assay: **DN41581\_g1\_i2 - SYBR** Intercept: **34.59** Slope: **-3.14** Error: **0.014** Correlation: **-0.990** Efficiency: **108.16**

**DN41581\_g1\_i2**
