# Supplementary material for: DEAD-Box RNA Helicase Family in Physic Nut (Jatropha curcas L.): Structural Characterization and Response to Salinity
Source: MDPI journal article supplement (doi:10.3390/plants13060905), 2024-03-21
Supplement: s1 [file s1]

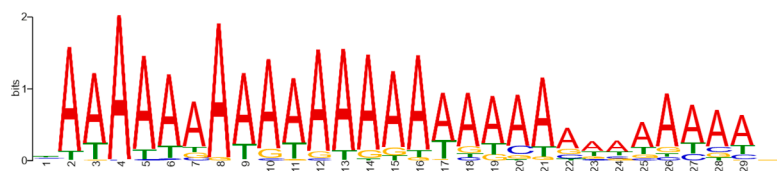

MA1267.1|Dof-type e-value: 2.8e-164

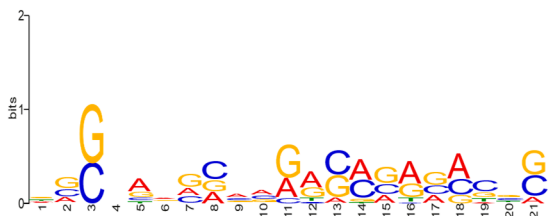

MA1402.1|BBR-BPC e-value: 9.8e-059

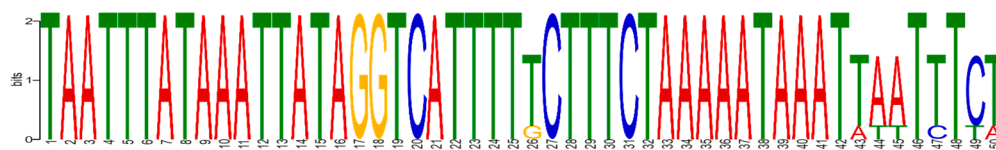

MA1214.1|HD-ZIP e-value: 4.4e-035

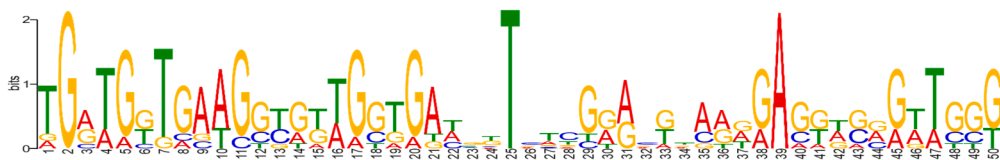

MA1260.1|AP2-ERF e-value: 2.0e-009

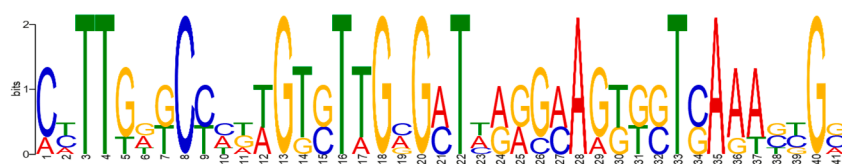

MA1090.1|WRKY e-value: 3.2e-006

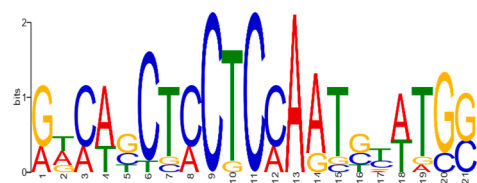

MA1284.1|bHLH e-value: 1.6e-004

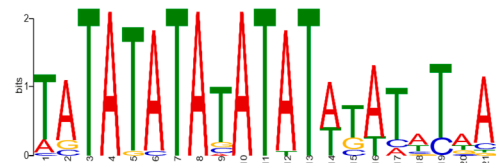

MA1191.1|Myb-related e-value: 5.2e-007

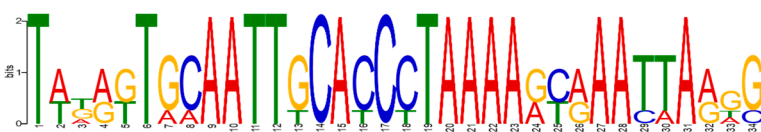

MA1355.1|Myb-related e-value: 4.6e-004
