# Supplementary figures and images for: DEAD-Box RNA Helicase Family in Physic Nut (Jatropha curcas L.): Structural Characterization and Response to Salinity
Source: MDPI journal article supplement (doi:10.3390/plants13060905), 2024-03-21

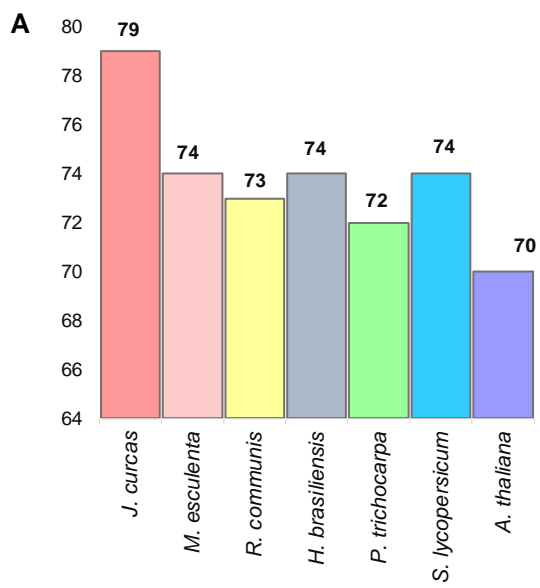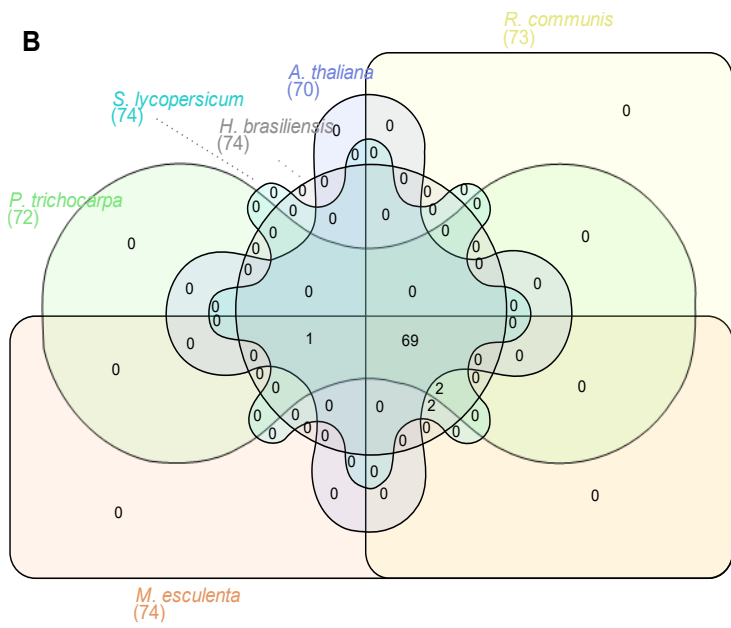

Supplement: s1 [file s1]

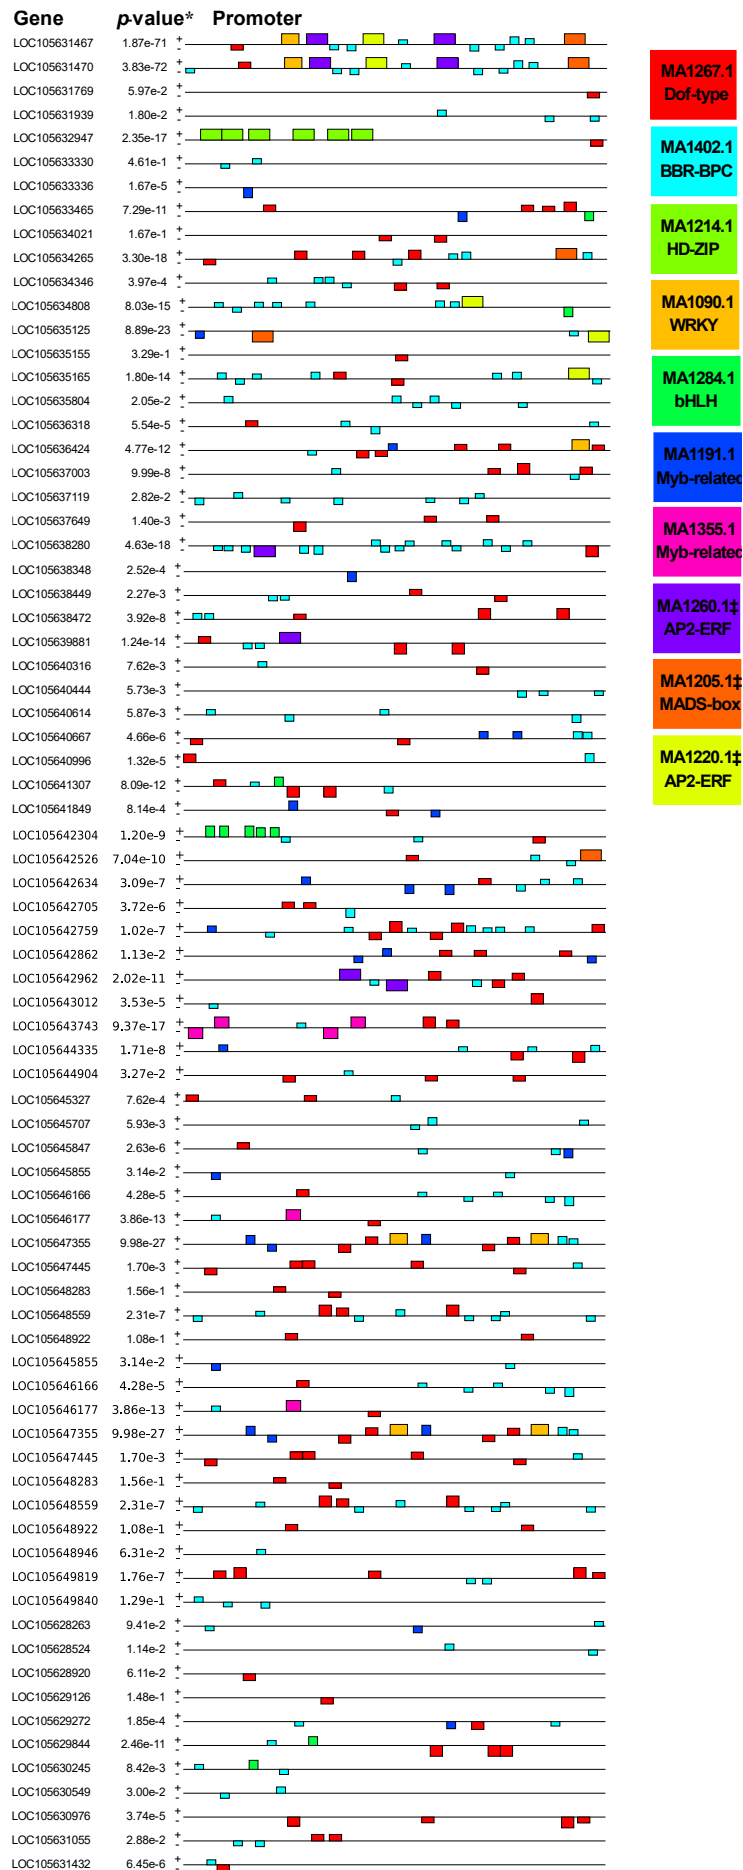

Supplement: s1 [file s1]

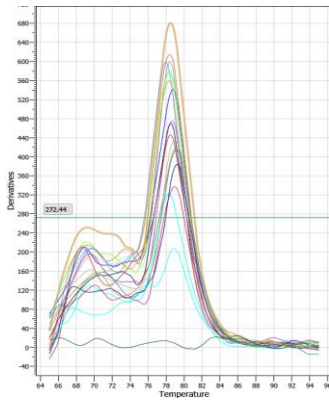

DN43295\_g1\_i2

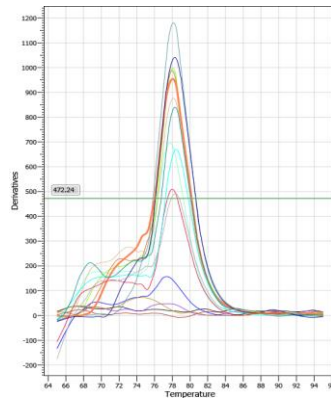

DN43259\_g2\_i2

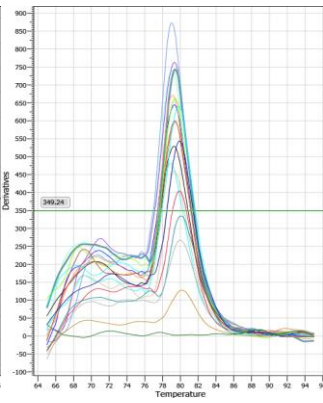

DN39804\_g2\_i2

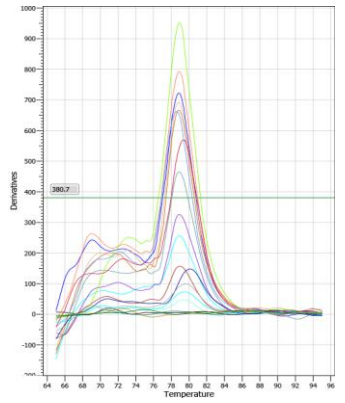

DN43635\_g1\_i2

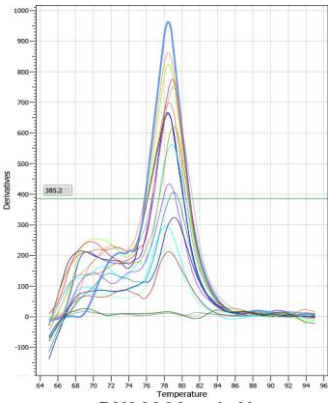

DN36330\_g1\_i1

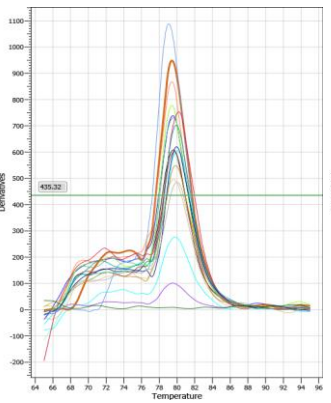

DN97737\_g2\_i1

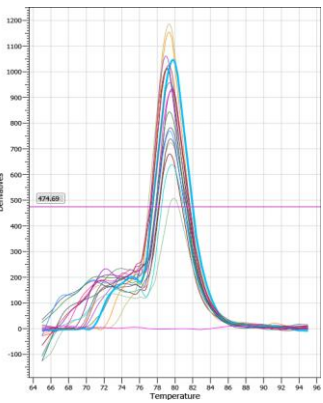

DN43391\_g1\_i3

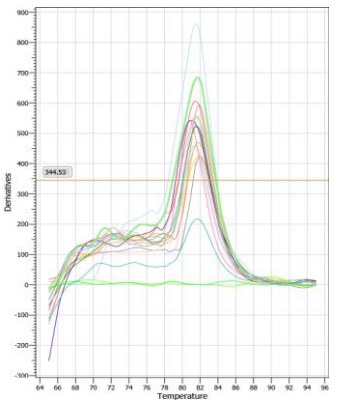

DN39804\_g2\_i1

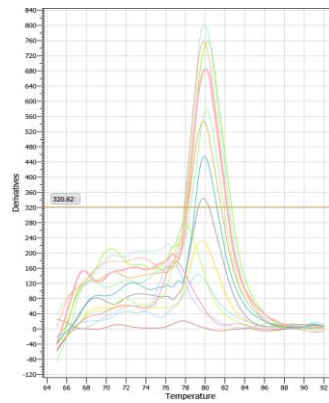

DN41581\_g1\_i2

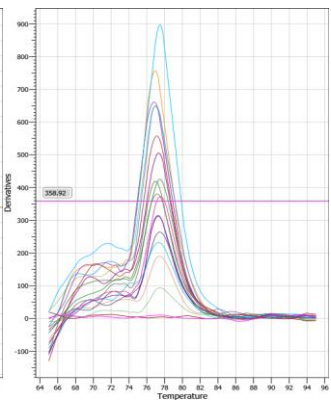

DN40374\_g1\_i2

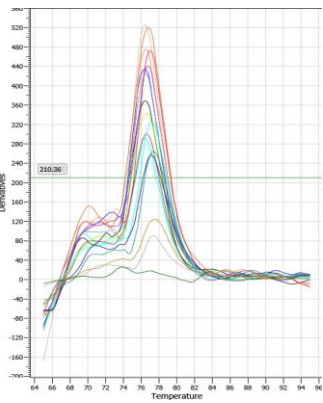

DN62351\_g1\_i1

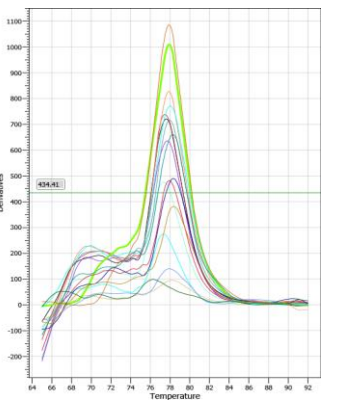

DN7180\_g1\_i1

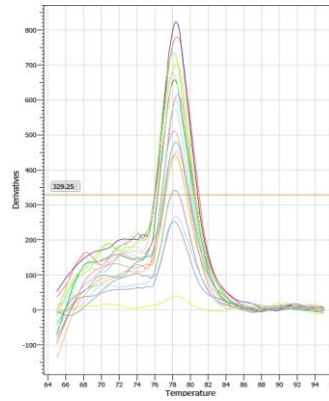

DN85598\_g1\_i1

Supplement: s1 [file s1]
